# Supplementary material for: Drug-Induced Acute Kidney Injury: A Study from the French Medical Administrative and the French National Pharmacovigilance Databases Using Capture-Recapture Method
Source: PubMed Central journal article supplement (PMC7824808; doi:10.3390/jcm10020168), 2021-01-06
Supplement: jcm-10-00168-s001.pdf [file jcm-10-00168-s001.pdf]

**Electronic Supplementary Materials**  
**Drug Safety**

**Drug-Induced Acute Kidney Injury: A Study from the French Medical Administrative and the French Pharmacovigilance Databases using Capture-Recapture Method**

Authors: Rolland AL<sup>1</sup>, Garnier AS<sup>2,4</sup>, Meunier K<sup>1</sup>, Drablier G<sup>3</sup>, Briet M<sup>3,4</sup>

<sup>1</sup>Département d'Information Médicale, Centre Hospitalo-Universitaire d'Angers, Angers, France, <sup>2</sup>Service de Néphrologie-Dialyse-Transplantation, Centre Hospitalo-Universitaire d'Angers, Angers, France, <sup>3</sup> Laboratoire de Pharmacologie-Toxicologie et Centre Régional de Pharmacovigilance, Centre Hospitalo-Universitaire d'Angers, Angers, France, <sup>4</sup>Laboratoire MitoVasc, INSERM U1083, CNRS UMR 6015, Université d'Angers, Angers, France

Corresponding author: Prof. Marie Briet

Address : Service de Pharmacologie-Toxicologie et Pharmacovigilance, Centre Hospitalo-Universitaire d'Angers, 4 rue Larrey, 49100 ANGERS

E-mail : [marie.briet@chu-angers.fr](mailto:marie.briet@chu-angers.fr)

Supplementary figures

**Figure S1** Flowchart of the extraction of stays with DIAKI from the PMSI database

**Figure S2** Flowchart of the extraction of stays with DIAKI from the FPVDB

Supplementary tables

Table S1 ICD-10 codes used for the PMSI database query

Table S2 KDIGO - AKI Classification

Table S3 Performance of PMSI database queries to detect DIAKIs

Table S4 Characteristics of patients who required renal replacement therapy

Inclusion criteria from the PMSI database:

- Stays with an entry date between January 1st, 2017 and December 31st, 2018, in adults;
- With at least one of these recorded ICD 10 codes in main diagnosis or associated diagnosis: N17.0, N17.1, N17.2, N17.8, N99.0, R39.2;
- No opposition to the use of the information collected for research.

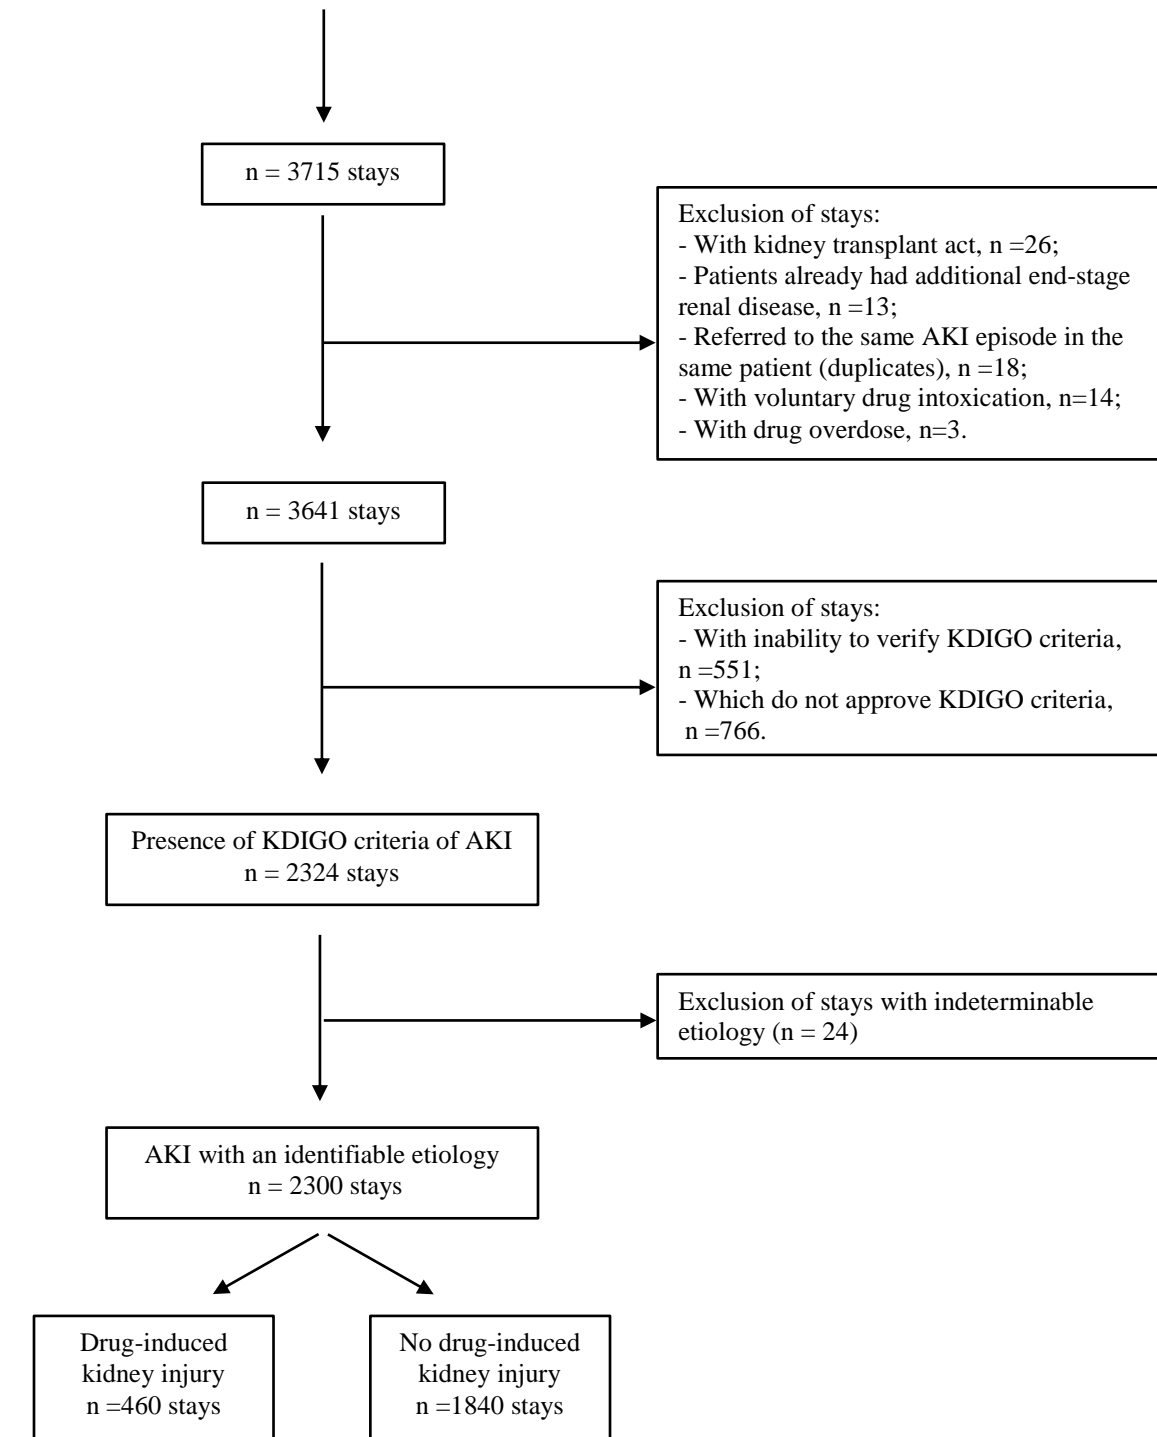

**Figure S1 Flowchart of the extraction of stays with DIAKI from the PMSI database**

AKI: Acute Kidney Injury; drug-induced acute kidney injury; ICD 10: International Statistical Classification of Diseases 10th Revision; KDIGO: Kidney Disease Improving Global Outcomes; PMSI: French Medical Information System Program

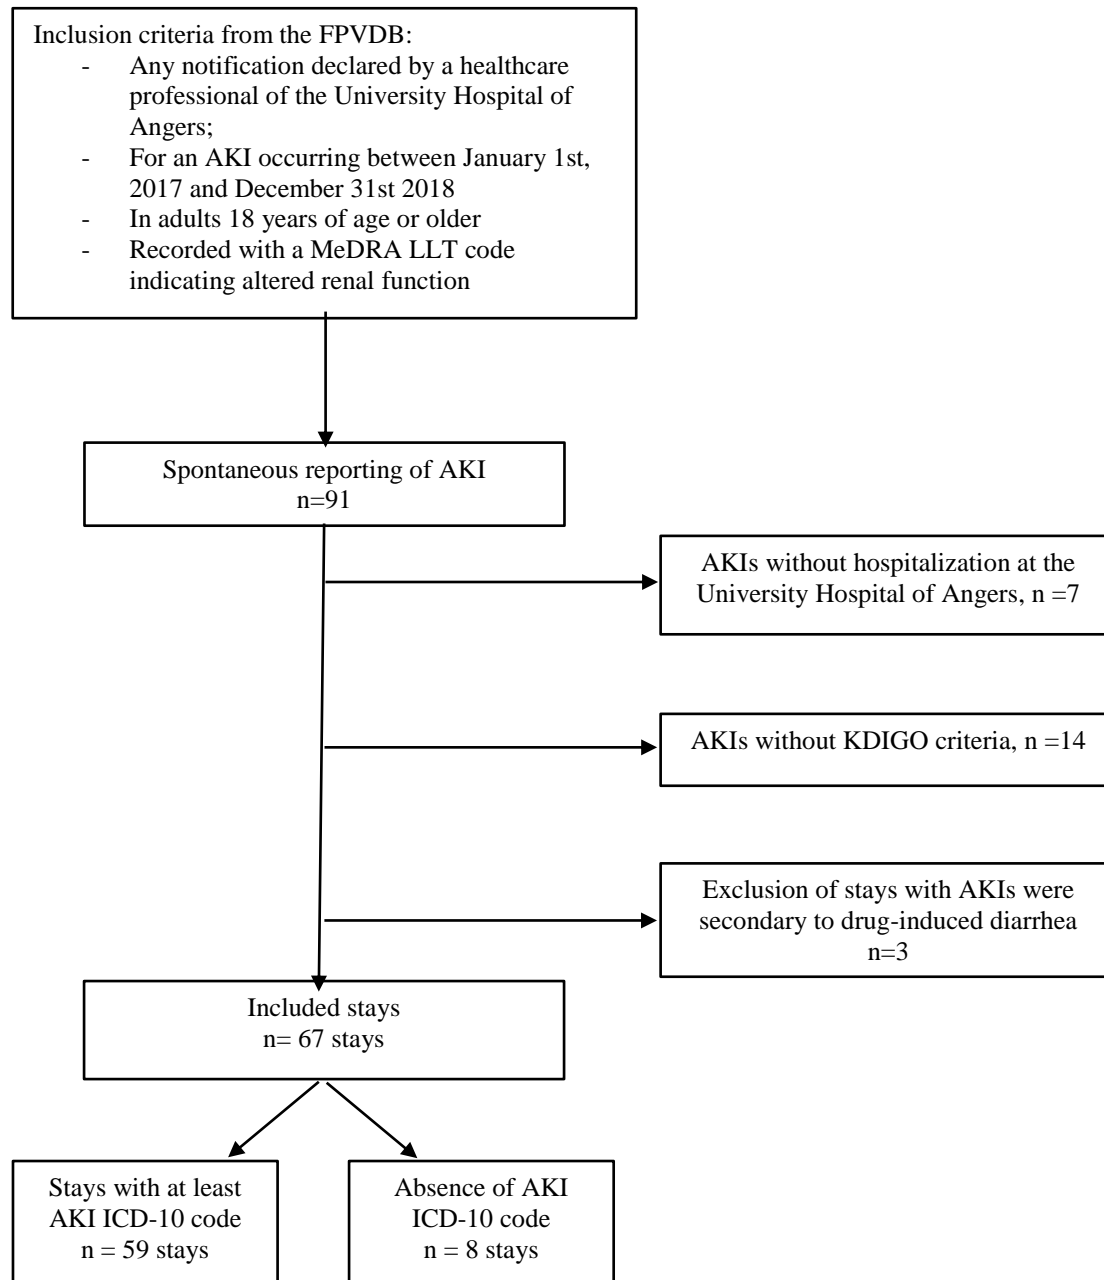

**Figure S2 Flowchart of the extraction of stays with DIAKI from the FPVDB request**

AKI: Acute Kidney Injury; drug-induced acute kidney injury; ICD 10: International Statistical Classification of Diseases 10th Revision; KDIGO: Kidney Disease Improving Global Outcomes; FPVDB: French Pharmacovigilance Database.

**Table S1 ICD-10 codes used for the PMSI database query[1]**

| <b>ICD-10 Codes</b> | <b>Diagnosis</b>                                 |
|---------------------|--------------------------------------------------|
| N17.0               | Acute renal failure with tubular necrosis        |
| N17.1               | Acute renal failure with acute cortical necrosis |
| N17.2               | Acute renal failure with medullary necrosis      |
| N17.8               | Other acute renal failure                        |
| N17.9               | Acute renal failure, unspecified                 |
| N99.0               | Postprocedural renal failure                     |
| R39.2               | Extrarenal uraemia                               |

ICD-10: International Classification of Diseases 10th Revision; PMSI: French Medical Information System Program

**Table S2 KDIGO - AKI Classification[2]**

| <b>Stage</b> | <b>Creatinine Criteria</b>                                                                                                                                                                                                                                    | <b>Urine Output Criteria</b>                                           |
|--------------|---------------------------------------------------------------------------------------------------------------------------------------------------------------------------------------------------------------------------------------------------------------|------------------------------------------------------------------------|
| 1            | Creatinine 1.5-1.9 times baseline,<br>OR<br>Creatinine increase >0,3mg/dL ( $\geq 26.5\mu\text{mol/l}$ ) increase                                                                                                                                             | <0.5ml/kg/h for 6-12<br>hours                                          |
| 2            | 2.0-2.9 times baseline                                                                                                                                                                                                                                        | <0.5ml/kg/h for $\geq 12$<br>hours                                     |
| 3            | 3.0 times baseline<br>OR<br>Increase in serum creatinine to<br>$\geq 4.0\text{mg/dl}$ ( $\geq 353.6\mu\text{mol/l}$ )<br>OR<br>Initiation of renal replacement therapy<br>OR, in patients <18 years, decrease in<br>eGFR to <35ml/min per 1.73 m <sup>2</sup> | <0.3 m/kg/h for $\geq 24$<br>hours<br>OR<br>Anuria for $\geq 12$ hours |

AKI: Acute Kidney Injury; KDIGO: Kidney Disease Improving Global Outcomes; SCr: Serum creatinine

**Table S3 Performance of PMSI database queries to detect DIAKIs**

|                                  | <b>DIAKI<br/>N=460</b> | <b>Total sample<sup>a</sup><br/>N=3715</b> | <b>Performance<sup>b</sup></b> |
|----------------------------------|------------------------|--------------------------------------------|--------------------------------|
| <b>ICD-10 codes</b>              | <b>N</b>               | <b>N</b>                                   | <b>%</b>                       |
| AKI code <sup>c</sup>            | 460                    | 3715                                       | 12,4                           |
| AKI code + ADR code <sup>d</sup> | 80                     | 282                                        | 28,4                           |
| N17                              | 158                    | 1247                                       | 12,7                           |
| N17. + ADR code                  | 32                     | 98                                         | 32,7                           |
| N99.0                            | 128                    | 825                                        | 15,5                           |
| N99.0 + ADR code                 | 23                     | 45                                         | 51,1                           |
| R39.2                            | 219                    | 1868                                       | 11,7                           |
| R39.2+ ADR code                  | 37                     | 171                                        | 21,6                           |

ADR : Adverse Drug Reaction; AKI: Acute Kidney Injury; DIAKI: Drug-induced Acute Kidney Injury; ICD-10: International Classification of Diseases 10th Revision; Code N17: Acute renal failure; Code N99: Postprocedural renal failure; Code R39.2: Extrarenal uraemia; PMSI: French Medical Information System Program.

<sup>a</sup>Several stay summaries included more than one AKI ICD-10 code.

<sup>b</sup>Performance is defined by the percentage of DIAKIs detected by the ICD-10 codes query.

<sup>c</sup>AKI ICD-10 codes are N17., N99.0 and R39.2.

<sup>d</sup>ADR ICD-10 codes are T88.7, and codes starting with Y40. and Y41.

**Table S4 Characteristics of patients who required renal replacement therapy**

|                                          | RRT<br>n=45 |      | No RRT<br>n=423 |      | P Value <sup>a</sup> |
|------------------------------------------|-------------|------|-----------------|------|----------------------|
|                                          | N           | %    | N               | %    |                      |
| Age >75 years                            | 16          | 35.6 | 243             | 57.4 | 0.005                |
| Male                                     | 32          | 71.1 | 256             | 60.5 | 0.165                |
| Chronic kidney disease                   | 9           | 20.0 | 97              | 22.0 | 0.656                |
| Heart failure                            | 11          | 24.4 | 131             | 31.0 | 0.365                |
| Diabetes mellitus                        | 12          | 26.7 | 115             | 27.2 | 0.941                |
| Sepsis                                   | 19          | 42.2 | 79              | 18.7 | <0.001               |
| Two drugs or more suspected in<br>DIAKIs | 19          | 42.2 | 158             | 37.4 | 0.632                |

DIAKI: Drug-induced Acute Kidney Injury; RRT: renal replacement therapy

<sup>a</sup>Pearson chi-square tests

## References

1. ICD-10 Version:2019. <https://icd.who.int/browse10/2019/en#/>. Accessed 5 Nov 2020
2. KDIGO Clinical Practice Guideline for Acute Kidney Injury (2012). *Kidney International Supplements* 2:1
